# Supplementary material
Source: PubMed Central journal article supplement (PMC2786943)

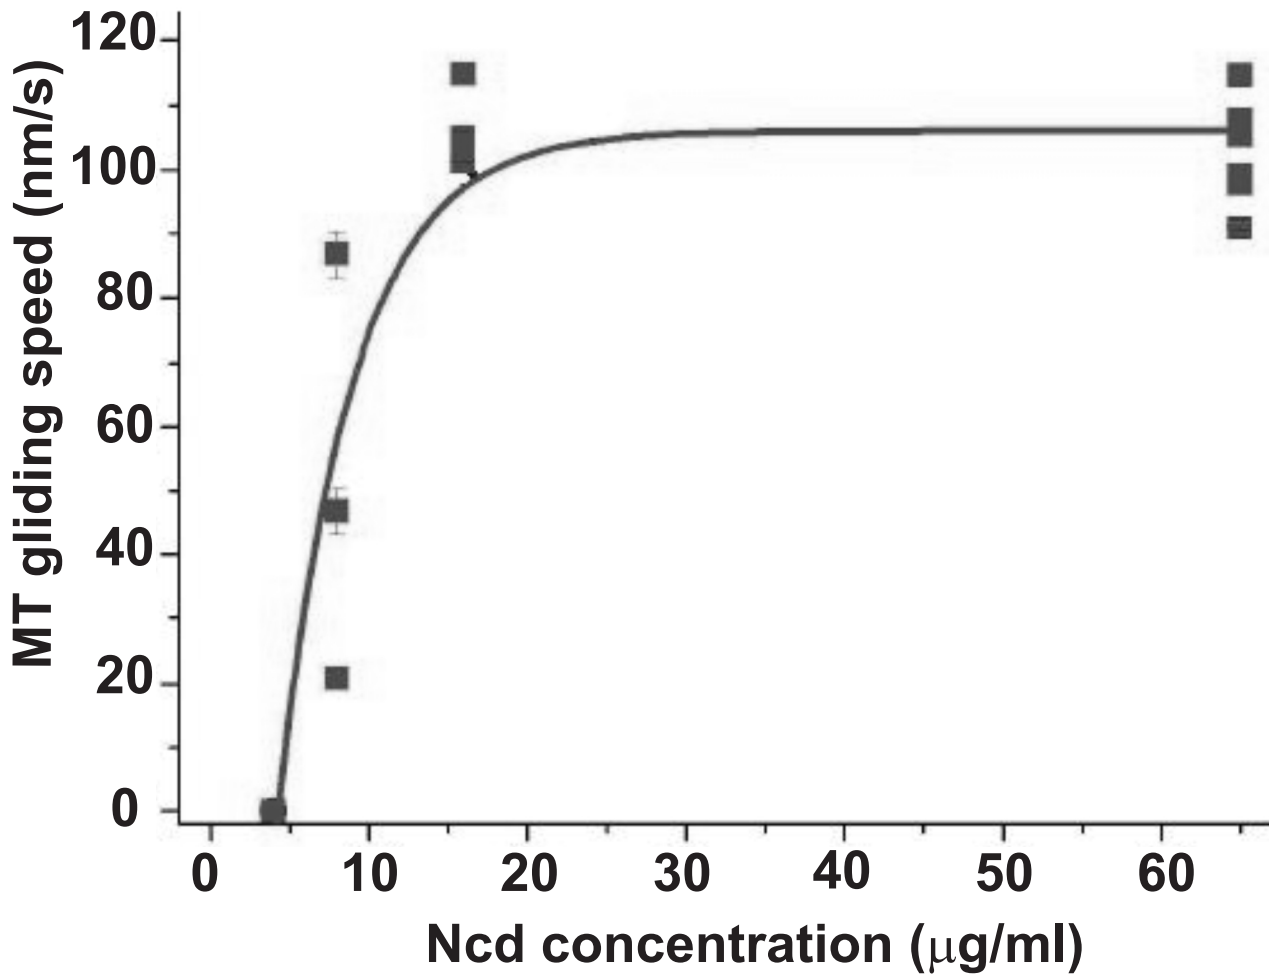

Supplement: 0709677105_1.pdf [file 0709677105_1.pdf]

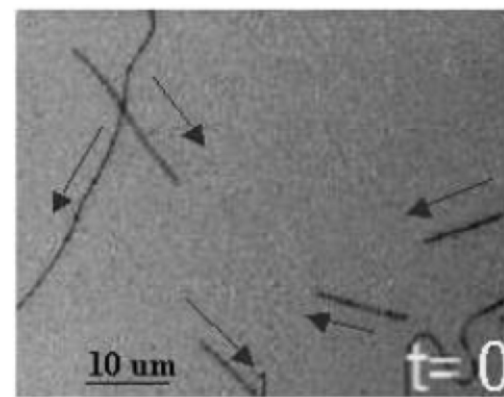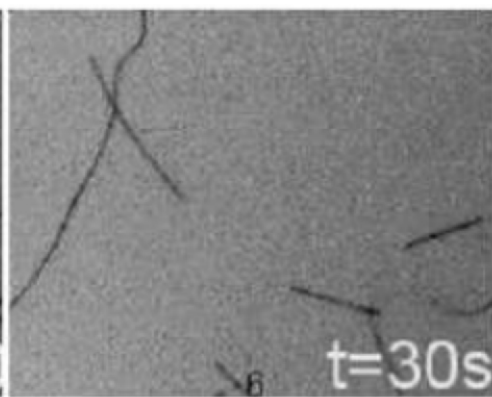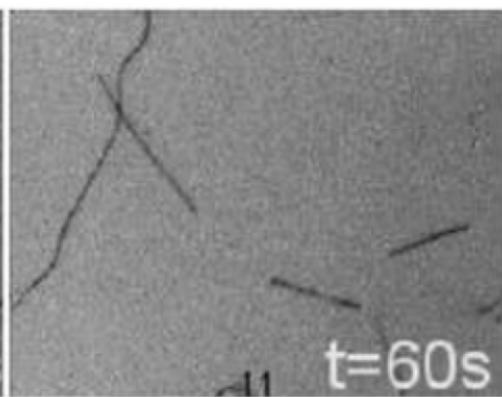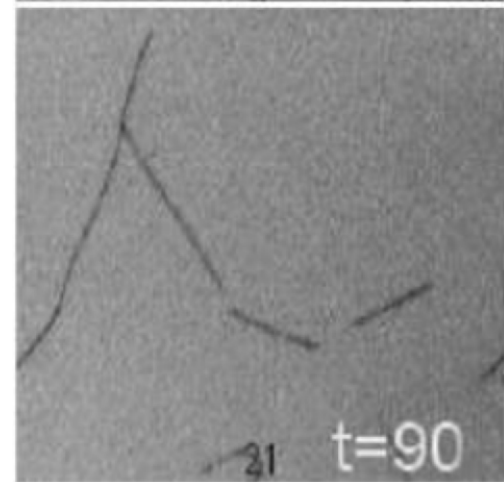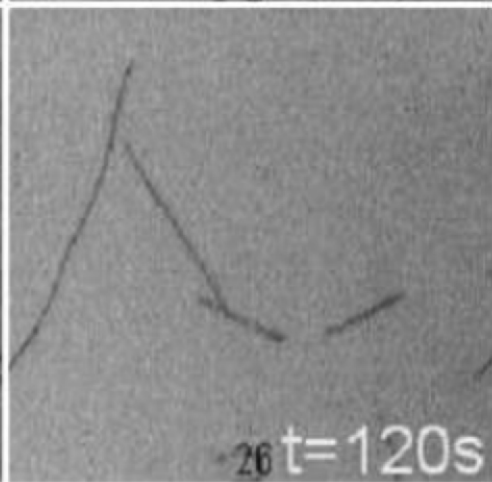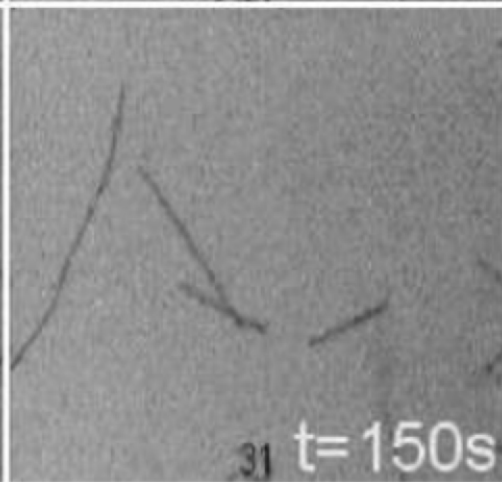

Supplement: 0709677105_2.pdf [file 0709677105_2.pdf]
